# Supplementary material for: Selective perfluorooctanoic acid (PFOA) and perfluorooctane sulfonate (PFOS) adsorption by nanoscale zero-valent iron (nZVI): performance and mechanisms
Source: Royal Society of Chemistry journal article supplement (doi:10.1039/d3en00987d), 2024-01-01
Supplement: d3en00987d1.pdf [file d3en00987d1.pdf]

## Supplementary Material

# **Selective perfluorooctanoic acid (PFOA) and perfluorooctane sulfonate (PFOS) adsorption by nanoscale zero-valent iron (nZVI): Performance and mechanisms**

Junhua Fang<sup>a</sup>, Kairan Xu<sup>b</sup>, Airong Liu<sup>a</sup>, Yinghao, Xue<sup>a</sup>, Luna Tie<sup>a</sup>, Rongliang Qiu<sup>b, c</sup>,

Wei-xian Zhang<sup>a, c</sup>, Zilong Deng<sup>a, \*</sup>

<sup>a</sup> College of Environmental Science and Engineering, State Key Laboratory of Pollution Control and Resource Reuse, Tongji University, Shanghai 200092

<sup>b</sup> South China Agricultural University, College of Natural Resources and Environment, Guangdong Provincial Key Laboratory of Agricultural & Rural Pollution Abatement and Environmental Safety, Guangzhou 510642

<sup>c</sup> Guangdong Laboratory for Lingnan Modern Agriculture, Guangzhou 510642

\*Corresponding author. Email: [zilongdeng@tongji.edu.cn](mailto:zilongdeng@tongji.edu.cn)

## Contents

|                                                                                                                                                                                                                       |    |
|-----------------------------------------------------------------------------------------------------------------------------------------------------------------------------------------------------------------------|----|
| <b>Text S1.</b> Adsorption kinetics. ....                                                                                                                                                                             | 3  |
| <b>Text S2.</b> Adsorption isotherm.....                                                                                                                                                                              | 3  |
| <b>Text S3.</b> Thermodynamic Calculations. ....                                                                                                                                                                      | 3  |
| <b>Text S4.</b> The method of calculating adsorption energies. ....                                                                                                                                                   | 4  |
| <b>Text S5.</b> Electrochemical measurements.....                                                                                                                                                                     | 5  |
| <b>Table S1.</b> Physical parameters of four iron-based materials.....                                                                                                                                                | 5  |
| <b>Table S2.</b> Formula, molecular weight, octanol-water partition coefficient ( $K_{ow}$ ), and acid dissociation constant ( $pK_a$ ) of the PFOA and PFOS.....                                                     | 5  |
| <b>Table S3.</b> Kinetic parameters of the pseudo-first-order and pseudo-second-order equations for PFOA/PFOS adsorption on nZVI. ....                                                                                | 6  |
| <b>Table S4.</b> Fitting parameters of intraparticle diffusion of PFOA and PFOS adsorbed by nZVI. ....                                                                                                                | 6  |
| <b>Table S5.</b> Rate constants of Langmuir and Freundlich models for the adsorption of PFOS and PFOA on nZVI.....                                                                                                    | 6  |
| <b>Table S6.</b> Fitted Langmuir isotherm parameters and thermodynamic calculations.....                                                                                                                              | 7  |
| <b>Table S7.</b> Binding energy data. ....                                                                                                                                                                            | 7  |
| <b>Figure S1.</b> Simulated structures of (a) PFOA and (b) PFOS after geometry optimization. Carbon, oxygen, sulfur, hydrogen, and fluorine atoms are shown in gray, red, yellow, white, and cyan, respectively. .... | 8  |
| <b>Figure S2.</b> The EDS spectra and element composition (insert graph) of (a) nZVI, (b) PFOA-adsorbed nZVI, and (c) PFOS-adsorbed nZVI. ....                                                                        | 9  |
| <b>Figure S4.</b> Adsorption energies of PFOA and PFOS on nZVI. ....                                                                                                                                                  | 11 |
| <b>Figure S5.</b> Electrochemical impedance spectroscopy of nZVI before and after adsorption of PFOA/PFOS.....                                                                                                        | 12 |

**Text. S1.** Adsorption kinetics.

Pseudo-first-order (S1), pseudo-second-order (S2), and intra-particle diffusion model (S3) are used to fit the adsorption process of PFOA/PFOS by nZVI, and the equation is as follows.

$$q_t = q_e \cdot (1 - e^{-k_1 \cdot t}) \quad (\text{S1})$$

$$q_t = \frac{k_2 \cdot q_e^2 \cdot t}{1 + k_2 \cdot q_e \cdot t} \quad (\text{S2})$$

$$q_t = k_p t^{1/2} + C \quad (\text{S3})$$

Where  $q_t$  and  $q_e$  represent the phosphate sorption capacity at a certain time and equilibrium,  $k_1$ ,  $k_2$ , and  $k_p$  are the rate constants of pseudo-first-order model, pseudo-second-order model, intra-particle diffusion model, respectively.

**Text. S2.** Adsorption isotherm.

Langmuir and Freundlich adsorption isotherm models were used to describe the adsorption of PFOA and PFOS in materials. The nonlinear equations for the Langmuir (S4) and Freundlich (S5) models are shown as follows:

$$\frac{C_e}{q_e} = \frac{C_e}{q_m} + \frac{1}{q_m K_L} \quad (\text{S4})$$

$$\ln q_e = \frac{1}{n} \ln C_e + \ln K_F \quad (\text{S5})$$

Here,  $q_e$  ( $\text{mg g}^{-1}$ ),  $q_m$  ( $\text{mg g}^{-1}$ ), and  $C_e$  ( $\text{mg L}^{-1}$ ) stand for the equilibrium sorption capacity, the maximum sorption capacity, and PFOA/PFOS concentration at equilibrium.  $K_L$  ( $\text{L mmol}^{-1}$ ) is the Langmuir constant.  $K_F$  ( $\text{mg g}^{-1}$ ) and  $1/n$  represent Freundlich's sorption capacity and heterogeneity factor, a parameter for adsorption intensity and surface heterogeneity. The favorable range of  $1/n$  is between 0 and 1.

**Text S3.** Thermodynamic Calculations.

Thermodynamic parameters for PFAS adsorption were first estimated using the Gibbs free energy equation and the linearized van't Hoff equation (i.e., the van't Hoff plot) as follows:

$$\Delta G^0 = -RT \ln K \quad (\text{S6})$$

$$\ln K = -\frac{\Delta H^0}{RT} + \frac{\Delta S^0}{R} \quad (\text{S7})$$

where  $\Delta G^0$  (kJ mol<sup>-1</sup>) is the change of free energy,  $\Delta H^0$  (kJ mol<sup>-1</sup>) is the change of enthalpy,  $\Delta S^0$  (kJ mol<sup>-1</sup>) is the change of entropy,  $T$  (K) is the absolute temperature,  $R$  is the ideal gas constant (0.008314 kJ mol<sup>-1</sup> K<sup>-1</sup>), and  $K$  is the dimensionless equilibrium coefficient.  $K$  can be estimated from the Langmuir constant ( $K_L$ ) as:

$$K = K_L * C_w \quad (\text{S8})$$

where  $C_w$  is the water concentration ( $5.56 \times 10^4$  mmol L<sup>-1</sup>).

Because adsorption enthalpy changes with surface coverage of adsorbed PFAS, assessing the enthalpy changes with increasing PFAS adsorption ( $q_e$ ) would be useful to understand the interaction between PFAS and nZVI. Thus, the observed molar differential enthalpies ( $\Delta H_{obs}$ ) of PFAS adsorption on nZVI were further estimated using the differential van't Hoff equation:

$$\Delta H_{obs} = -R \frac{d(\ln(\frac{q_e}{C_e}))}{d(\frac{1}{T})} \quad (\text{S9})$$

At any given  $q_e$ ,  $C_e$  was computed using the Langmuir parameters obtained at different temperatures.  $\Delta H_{obs}$  was then calculated from the slope of the linear plots of  $\ln(q_e/C_e)$  versus  $1/T$ .

**Text S4.** The method of calculating adsorption energies.

The adsorption energy ( $E_{ad}$ ) can be calculated by the following expression:

$$E_{ad} = E_{surf+ad} - E_{surf} - E_{gas}$$

where  $E_{\text{surf+ad}}$ ,  $E_{\text{surf}}$  and  $E_{\text{gas}}$  refer to the energy of PFOA/PFOS adsorbed on the surface, the energy of bare surface and the gas energy of PFOA/PFOS.

### **Text S5.** Electrochemical measurements

Electrochemical impedance spectroscopy (EIS) was used to determine  $R_{\text{CT}}$  (charge transfer resistance), and EIS was performed at frequencies ranging from 0.1 MHz to 0.01 Hz at open circuit potential with a potential amplitude of 50 mV. The chronoamperometry is carried out at open circuit voltage. Tafel scans were performed by polarizing work electrodes  $\pm 500$  mV with respect to the open circuit potential at a scan rate of 10 mV s<sup>-1</sup>. The corrosion currents  $I_{\text{corr}}$  was estimated from the Tafel plots by using both cathodic and anodic branches of the potentiodynamic polarization curves.

**Table S1.** Physical parameters of four iron-based materials

| Adsorbent                      | Average size (nm) | specific surface area (m <sup>2</sup> /g) |
|--------------------------------|-------------------|-------------------------------------------|
| nZVI                           | 60                | 25–35                                     |
| FeOOH                          | 50                | 76                                        |
| Fe <sub>2</sub> O <sub>3</sub> | 30                | 90                                        |
| Fe <sub>3</sub> O <sub>4</sub> | 30                | 66                                        |

**Table S2.** Formula, molecular weight, octanol-water partition coefficient ( $K_{\text{ow}}$ ), and acid dissociation constant (pKa) of the PFOA and PFOS.

|      | Formula   | Molecular weight, g/mol | Log $K_{ow}^a$ , log (L/L) | pKa                |
|------|-----------|-------------------------|----------------------------|--------------------|
| PFOA | C7F15COOH | 414.07                  | 4.30                       | -0.2 <sup>1</sup>  |
| PFOS | C8F17SO3K | 538.22                  | 5.25                       | -3.27 <sup>2</sup> |

**Table S3.** Kinetic parameters of the pseudo-first-order and pseudo-second-order equations for PFOA/PFOS adsorption on nZVI.

| Adsorbent | Pseudo-first-order parameter |                          |       | Pseudo-second-order parameter |                |       |
|-----------|------------------------------|--------------------------|-------|-------------------------------|----------------|-------|
|           | $q_e$ (mg/g)                 | $k_1$ (h <sup>-1</sup> ) | $R^2$ | $q_e$ (mg/g)                  | $v_0$ (mg/g/h) | $R^2$ |
| PFOA      | 5.208                        | 0.808                    | 0.942 | 5.527                         | 3.394          | 0.967 |
| PFOS      | 133.816                      | 0.411                    | 0.968 | 141.044                       | 56.338         | 0.995 |

**Table S4.** Fitting parameters of intraparticle diffusion of PFOA and PFOS adsorbed by nZVI.

| Adsorbent | Stage 1  |       |         | Stage 2  |       |         | Stage 3  |        |         |
|-----------|----------|-------|---------|----------|-------|---------|----------|--------|---------|
|           | $K_{d1}$ | $C_1$ | $R_1^2$ | $K_{d2}$ | $C_2$ | $R_2^2$ | $K_{d3}$ | $C_3$  | $R_3^2$ |
| PFOA      | 1.61     | 0.94  | 0.99    | 0.57     | 2.93  | 0.99    | 0.03     | 5.20   | 0.96    |
| PFOS      | 32.76    | 14.56 | 0.99    | 19.51    | 42.48 | 0.99    | -0.04    | 134.27 | 0.25    |

**Table S5.** Rate constants of Langmuir and Freundlich models for the adsorption of PFOS and PFOA on nZVI.

| Adsorbent | Langmuir parameters |              |       | Freundlich parameters |       |       |
|-----------|---------------------|--------------|-------|-----------------------|-------|-------|
|           | $q_m$ (mg/g)        | $K_L$ (L/mg) | $R^2$ | $K_f$ (mg/g)          | $n$   | $R^2$ |
| PFOA      | 17.632              | 0.185        | 0.985 | 3.734                 | 2.137 | 0.975 |
| PFOS      | 256.239             | 0.296        | 0.957 | 96.808                | 3.374 | 0.941 |

**Table S6.** Fitted Langmuir isotherm parameters and thermodynamic calculations.

| Adsorbent | Temperature (K) | Langmuir parameters |              |       | thermodynamics                           |                                          |                                                          |
|-----------|-----------------|---------------------|--------------|-------|------------------------------------------|------------------------------------------|----------------------------------------------------------|
|           |                 | $q_m$ (mg/g)        | $K_L$ (L/mg) | $R^2$ | $\Delta G^\circ$ (kJ mol <sup>-1</sup> ) | $\Delta H^\circ$ (kJ mol <sup>-1</sup> ) | $\Delta S^\circ$ (kJ mol <sup>-1</sup> K <sup>-1</sup> ) |
| PFOA      | 298             | 17.632              | 0.185        | 0.985 | -37.818                                  |                                          |                                                          |
|           | 308             | 12.301              | 0.155        | 0.988 | -38.634                                  | -13.894                                  | 0.080                                                    |
|           | 318             | 6.155               | 0.130        | 0.990 | -39.424                                  |                                          |                                                          |
| PFOS      | 298             | 256.239             | 0.296        | 0.941 | -39.450                                  |                                          |                                                          |
|           | 308             | 181.441             | 0.053        | 0.992 | -36.37                                   | -90.639                                  | -0.1732                                                  |
|           | 318             | 90.573              | 0.03         | 0.987 | -36.046                                  |                                          |                                                          |

**Table S7.** Binding energy data.

| Substance | Binding energy (eV) | The types of bonds | Atomic % |
|-----------|---------------------|--------------------|----------|
| nZVI      | 284.76              | C–C                | 73.88    |
|           | 286.41              | C–OH               | 11.26    |
|           | 288.55              | C=O                | 14.86    |
| nZVI      | 284.76              | C–C                | 67.39    |

| Substance     | Binding energy (eV) | The types of bonds | Atomic % |
|---------------|---------------------|--------------------|----------|
| nZVI          | 284.76              | C–C                | 73.88    |
|               | 286.41              | C–OH               | 11.26    |
|               | 288.55              | C=O                | 14.86    |
| +PFOA         | 286.38              | C–OH               | 9.9      |
|               | 288.82              | C=O                | 14.71    |
|               | 291.53              | CF <sub>2</sub>    | 6.47     |
|               | 294.31              | CF <sub>3</sub>    | 1.53     |
| nZVI<br>+PFOS | 284.84              | C–C                | 49.47    |
|               | 286.39              | C–OH               | 8.4      |
|               | 289.13              | C=O                | 14.46    |
|               | 291.77              | CF <sub>2</sub>    | 21.19    |
|               | 294.1               | CF <sub>3</sub>    | 6.48     |

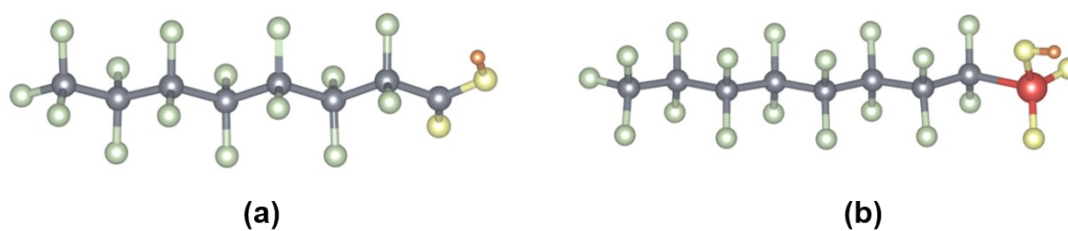

**Figure S1.** Simulated structures of (a) PFOA and (b) PFOS after geometry optimization. Carbon, oxygen, sulfur, hydrogen, and fluorine atoms are shown in gray, red, yellow, white, and cyan, respectively.



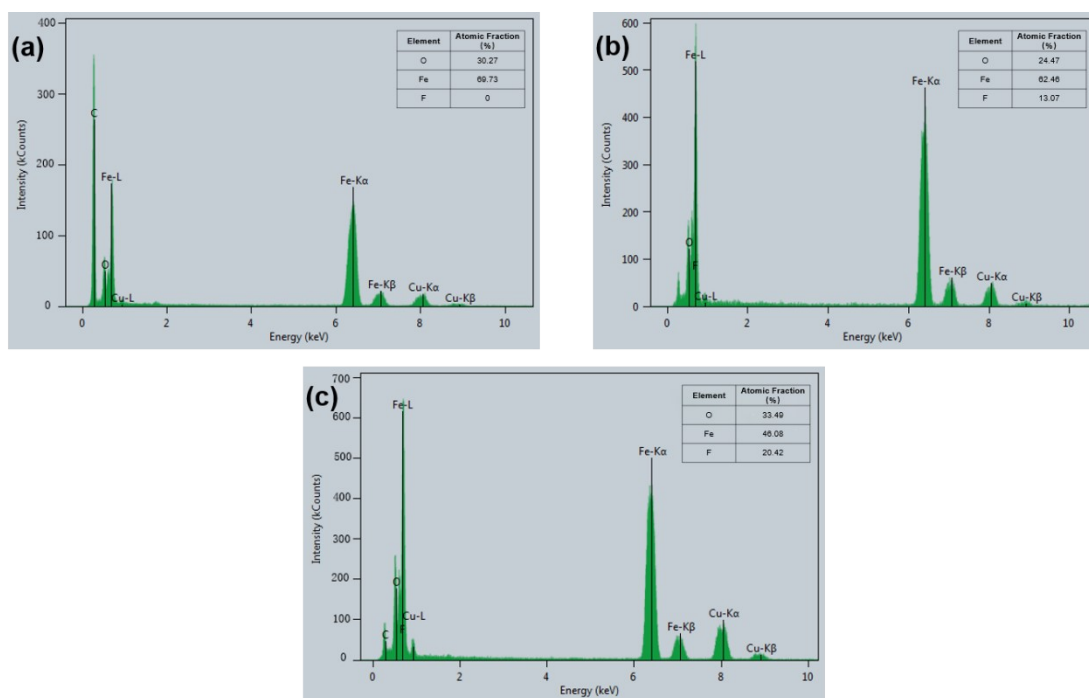

**Figure S2.** The EDS spectra and element composition (insert graph) of (a) nZVI, (b) PFOA-adsorbed nZVI, and (c) PFOS-adsorbed nZVI.

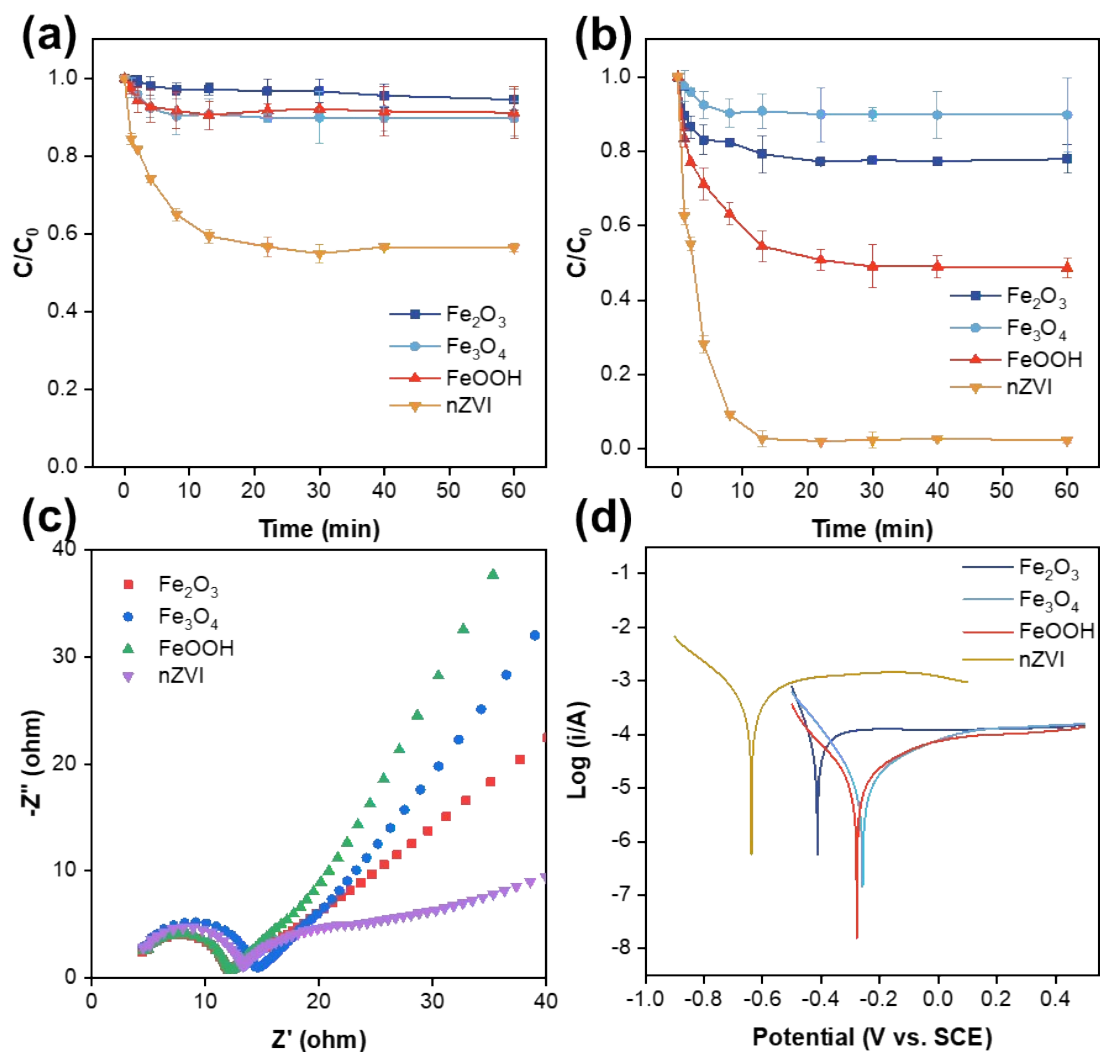

**Figure S3.** Removal of PFOA (a) and PFOS (b) by different iron-based materials. Experimental conditions: 1 mg/L PFOA / 10 mg/L PFOS, 0.2 g/L iron-based materials ( $Fe_2O_3$ ,  $Fe_3O_4$ ,  $FeOOH$ , nZVI), and initial pH 7.0. (c) Electrochemical impedance spectra (d) Tafel profiles of  $Fe_2O_3$ ,  $Fe_3O_4$ ,  $FeOOH$ , and nZVI.

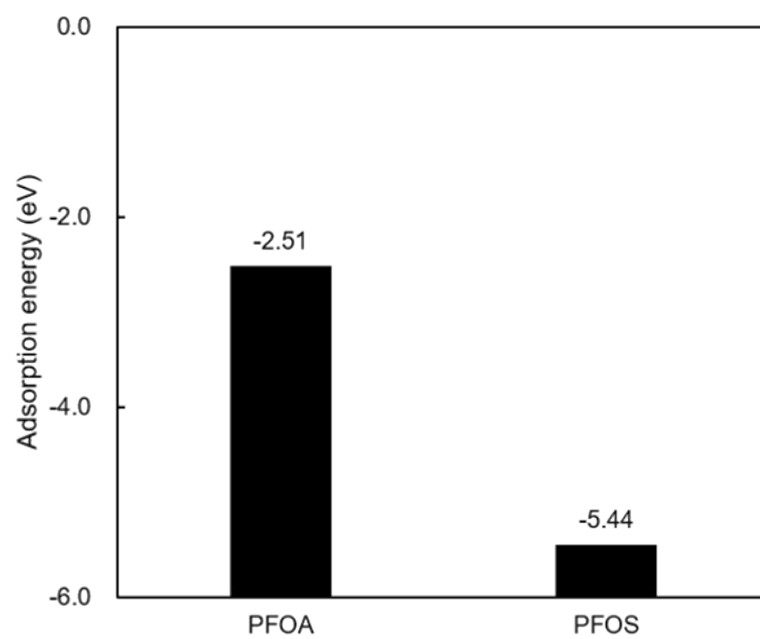

**Figure S4.** Adsorption energies of PFOA and PFOS on nZVI.

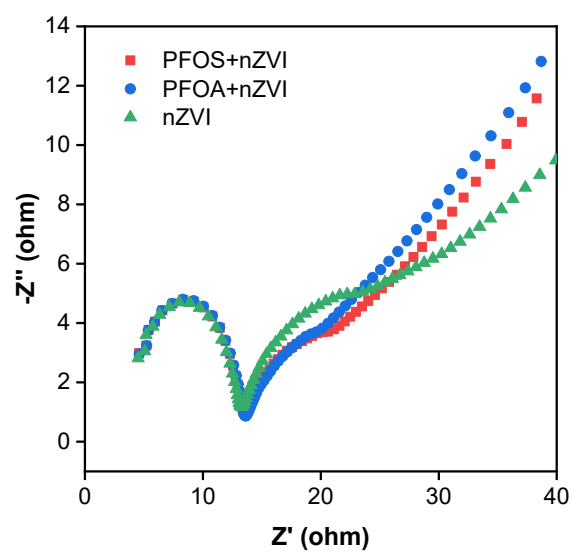

**Figure S5.** Electrochemical impedance spectroscopy of nZVI before and after adsorption of PFOA/PFOS.

## References

1. S. Rayne and K. Forest, Theoretical studies on the pKa values of perfluoroalkyl carboxylic acids, *Journal of Molecular Structure-Theochem*, 2010, **949**, 60-69.
2. Y. Zhang, Y. Zhi, J. Liu and S. Ghoshal, Sorption of Perfluoroalkyl Acids to Fresh and Aged Nanoscale Zerovalent Iron Particles, *Environmental Science & Technology*, 2018, **52**, 6300-6308.
